# Supplementary material
Source: PubMed Central journal article supplement (PMC7660421)
Supplement: mmc1.pdf [file mmc1.pdf]

**PATTER, Volume 1**

**Supplemental Information**

**Using Machine Learning to Identify**

**Adverse Drug Effects Posing**

**Increased Risk to Women**

**Payal Chandak and Nicholas P. Tatonetti**

| Study                                        | Drug          | ADR                             | Expected Sex | Predicted Sex     | logROR | 95% CI       |
|----------------------------------------------|---------------|---------------------------------|--------------|-------------------|--------|--------------|
| Tamargo et al. 2017                          | Paracetamol   | Acute hepatic failure           | F            | No risk           | -      | -            |
| Yu et al. 2016                               | Ibuprofen     | Cholecystitis chronic           | F            | F                 | 3.64   | (3.54, 3.75) |
| Ofotokun et al. 2003                         | Ritonavir     | Diarrhoea                       | M            | M                 | 0.27   | (0.29, 0.25) |
| Makkar et al. 1993,<br>Drici et al. 2001     | Amiodarone    | Electrocardiogram QT prolonged  | F            | F                 | 0.68   | (0.60, 0.75) |
| Makkar et al. 1993,<br>Drici et al. 2001     | Disopyramide  | Electrocardiogram QT prolonged  | F            | Insufficient data | -      | -            |
| Seeman et al. 2020                           | Thioridazine  | Electrocardiogram QT prolonged  | F            | Insufficient data | -      | -            |
| Makkar et al. 1993,<br>Drici et al. 2001     | Sotalol       | Electrocardiogram QT prolonged  | F            | No risk           | -      | -            |
| Parekh et al. 2011                           | Rosiglitazone | Fractures                       | F            | F                 | 0.80   | (0.76, 0.83) |
| Tamargo et al. 2017                          | Heparin       | Haemorrhage                     | F            | No risk           | -      | -            |
| Tharpe et al. 2011                           | Citalopram    | Hyponatraemia                   | F            | F                 | 0.21   | (0.19, 0.23) |
| Seeman et al. 2020                           | Clozapine     | Metabolic syndrome              | F            | No risk           | -      | -            |
| Ofotokun et al. 2003                         | Ritonavir     | Nausea                          | F            | F                 | 0.29   | (0.28, 0.31) |
| Schmetzer et al. 2012                        | Ifosfamide    | Neurotoxicity                   | F            | No risk           | -      | -            |
| Schmetzer et al. 2012                        | Fluorouracil  | Neutropenia                     | F            | F                 | 0.17   | (0.16, 0.19) |
| Whitley et al. 2009,<br>Tharpe et al. 2011   | Aspirin       | Platelet aggregation inhibition | M            | No risk           | -      | -            |
| Tamargo et al. 2017                          | Diazepam      | Psychomotor skills impaired     | F            | No risk           | -      | -            |
| Tharpe et al. 2011                           | Fentanyl      | Respiratory depression          | F            | No risk           | -      | -            |
| Tharpe et al. 2011                           | Oxycodone     | Respiratory depression          | F            | No risk           | -      | -            |
| Tamargo et al. 2017                          | Procainamide  | Systemic lupus erythematosus    | F            | Insufficient data | -      | -            |
| Tamargo et al. 2017                          | Aspirin       | Ulcers                          | M            | No risk           | -      | -            |
| Franconi et al. 2007,<br>Whitley et al. 2009 | Metoprolol    | Vascular hypertensive disorders | F            | F                 | 0.33   | (0.32, 0.34) |
| Franconi et al. 2007                         | Amlodipine    | Vascular hypertensive disorders | F            | F                 | 0.17   | (0.17, 0.18) |

**Table S4:** Hypotheses and results for clinical validation.

Abbreviations: M - Male; F - Female; ADR - Adverse drug reaction; logROR - log<sub>e</sub> Reporting Odds Ratio; CI - Confidence Interval

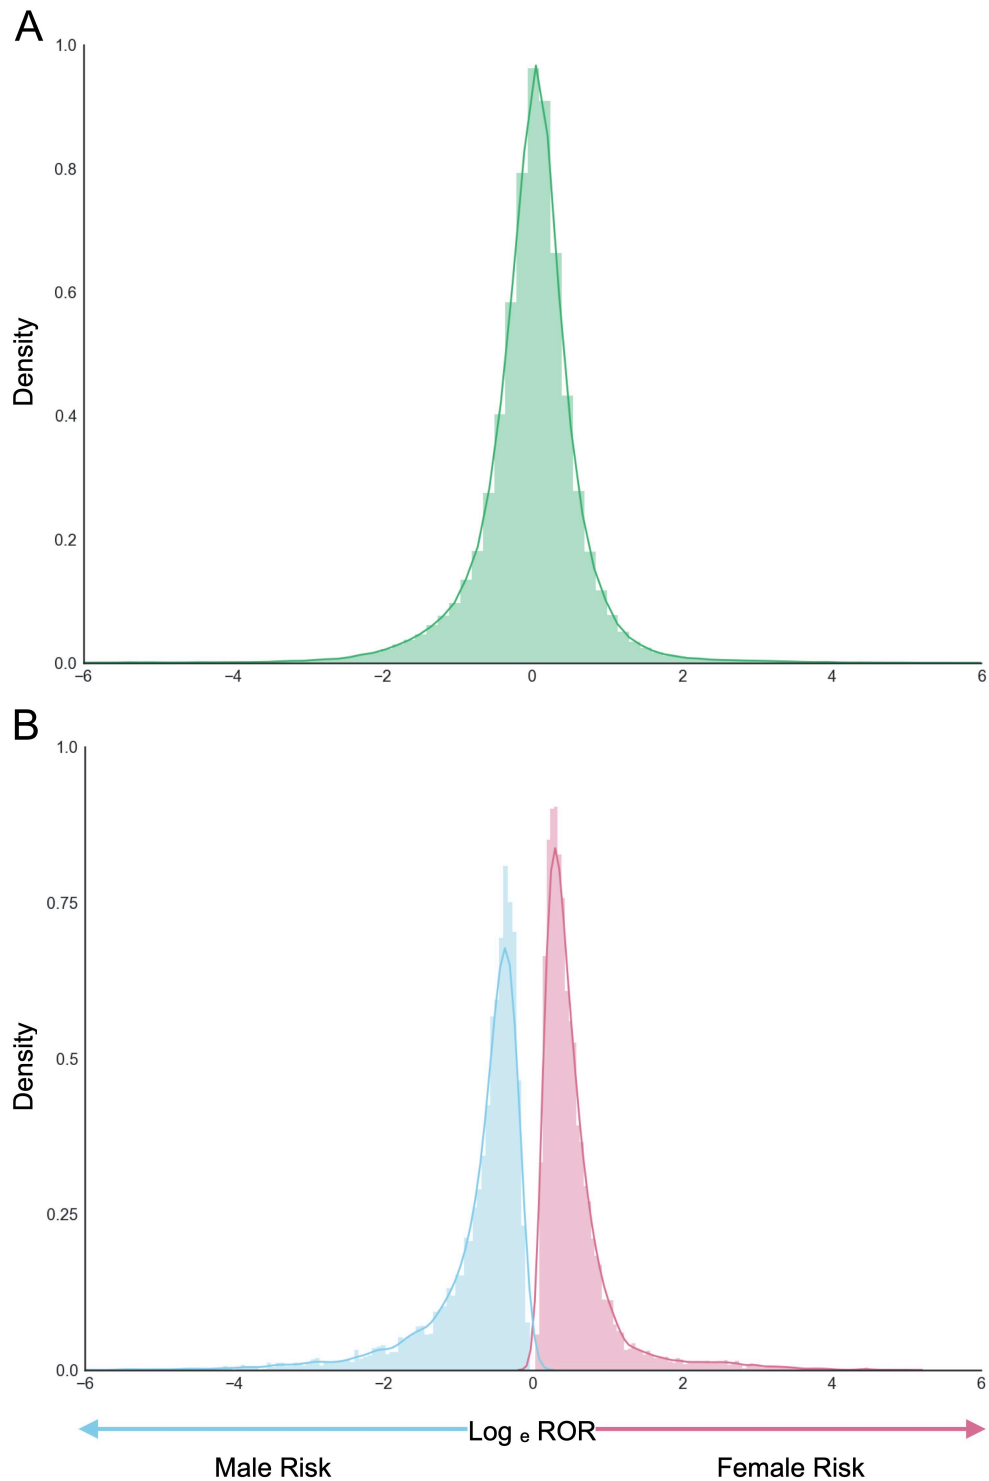

**Figure S1: Distribution of sex risks.** Both histograms visualize the magnitude of sex risks ( $\log_e$  ROR; x-axis) against normalized counts (density; y-axis). Panel A shows that the distribution of all sex risks follows a normal distribution. Panel B depicts the distribution of significant sex risks (adjusted  $P \leq 0.05$ ) grouped by sex. Pink indicates female risk and blue indicates male risk. Both distributions follow a lognormal distribution.

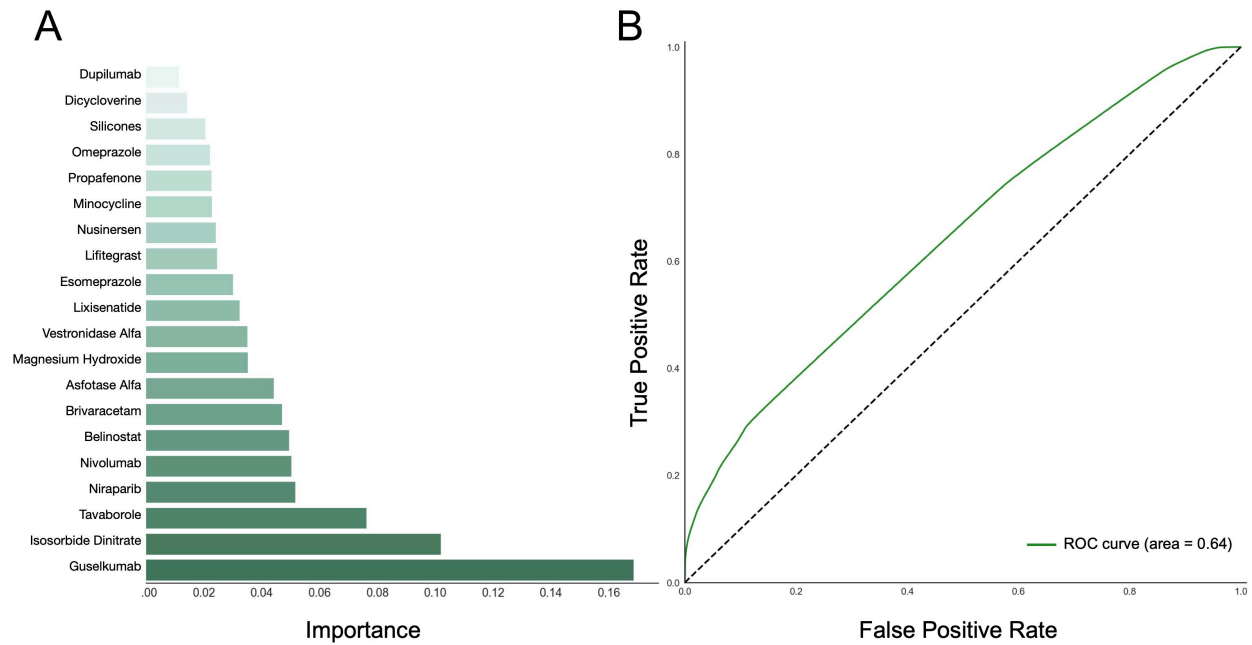

**Figure S2: Characterizing the random forest model.** Panel A shows features that had the highest importances. Panel B shows a receiver operating characteristic curve, where classification thresholds reflect different cut-offs in the estimated propensity score.

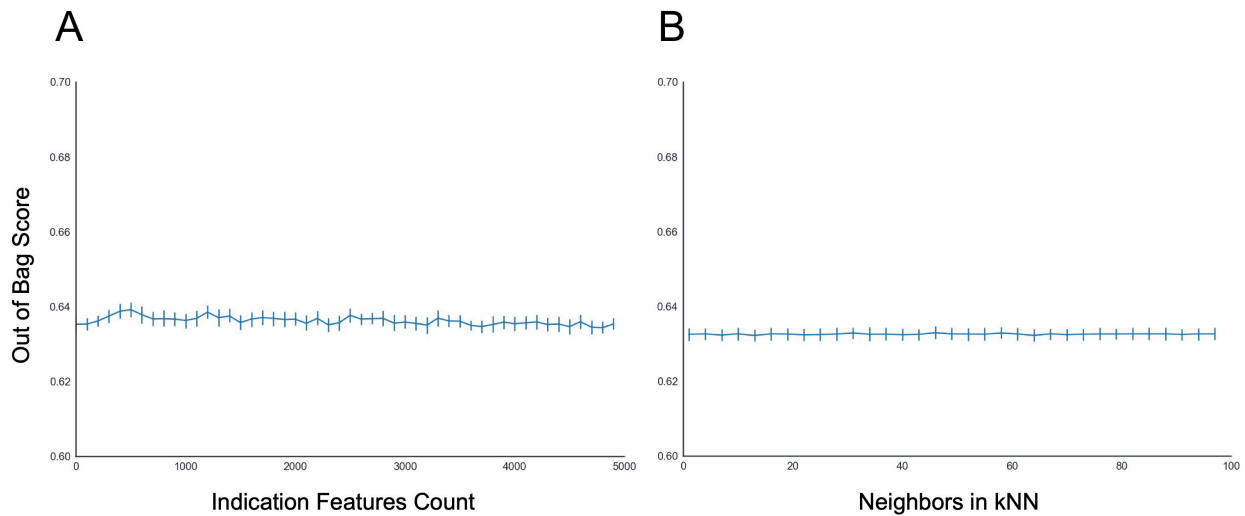

**Figure S3: Random forest model is sufficiently robust.** Making the random forest model more complex does not change performance. In both panels, each point indicates performance for the given experiment. Performance is represented as mean out of bag score  $\pm$  95% confidence intervals. Panel A shows the effect of adding upto 5000 indication features on performance. In each consecutive experiment, we add 100 indication features with the highest report counts. In Panel B, we test the outcome of using k-Nearest Neighbors to impute age for missing reports. Each successive experiment increases the number of neighbors. As shown by the flat lines in both panels, the model's performance remains largely unchanged by these modifications.

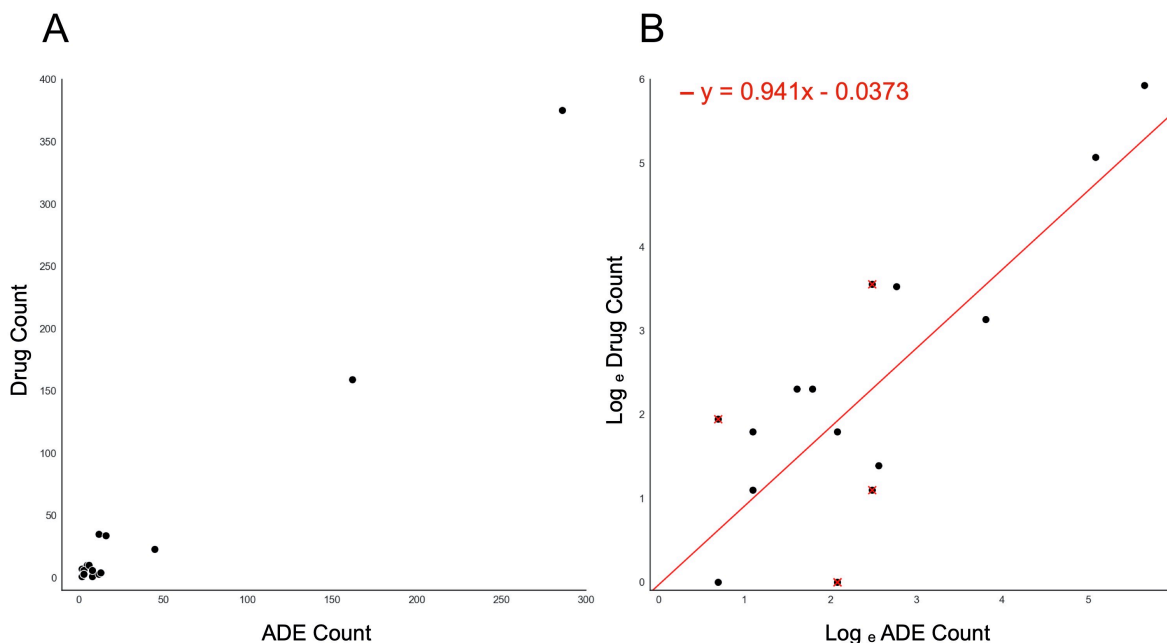

**Figure S4: Prediction of pharmacogenes from sex risks.** We leveraged sex risks identified by AwareDX to flag genes that could have variants with important, and possibly undiscovered, pharmacokinetic and pharmacodynamic effects. Both scatter plots visualize the count of drugs (y-axis) against the count of significant drug-event pairs identified by AwareDX (x-axis). Panel A shows a linear scale and Panel B shows a logarithmic scale. In B, we applied linear regression and used the residuals as a ranking mechanism to identify top sex-varying pharmacogene candidates (marked in red).

## Supplemental References

- Tamargo J., Rosano G., Walther T., Duarte J., Niessner A., Kaski J.C., et al. (2017). Gender differences in the effects of cardiovascular drugs. *Eur. Heart J. Cardiovasc. Pharmacother.* 3:163–182.
- Yu Y., Chen J., Li D., Wang L., Wang W., Liu H. (2016). Systematic analysis of adverse event reports for sex differences in adverse drug events. *Sci. Rep.* 6. doi:10.1038/srep24955.
- Ofotokun I., Pomeroy C. (2003). Sex differences in adverse reactions to antiretroviral drugs. *Top. HIV Med.* 11:55–59.
- Makkar R., Fromm B., Steinman R., Meissner M., Lehmann M. (1993). Female gender as a risk factor for torsades de pointes associated with cardiovascular drugs. *JAMA* 270:8.
- Drici M.-D., Clement N. (2001). Is gender a risk factor for adverse drug reactions? The example of drug-induced long QT syndrome. *Drug Saf.* 24:575–585.
- Seeman M.V. (2020). Men and women respond differently to antipsychotic drugs. *Neuropharmacology* 163:107.
- Parekh A., Fadiran E.O., Uhl K., Throckmorton D.C. (2011). Adverse effects in women: Implications for drug development and regulatory policies. *Expert Rev. Clin. Pharmacol.* 4:453–466.
- Tharpe N. (2011). Adverse drug reactions in women’s health care. *J. Midwifery Women’s Health* 56:205–213.
- Schmetzer O., Flörcken A. (2012). Sex differences in the drug therapy for oncologic diseases. *Handbook Exp. Pharmacol.* 214:411–442.
- Whitley H.P., Lindsey W. (2009). Sex-based differences in drug activity. *Am. Fam. Phys.* 80:1254–1258.
- Franconi F., Brunelleschi S., Steardo L., Cuomo V. (2007). Gender differences in drug responses. *Pharmacol. Res.* 55:81–95.
